# Supplementary material for: Designing and implementing an integrated non-communicable disease primary care intervention in rural Nepal
Source: PubMed Central journal article supplement — BMJ Glob Health. 2019 Apr 29;4(2):e001343. doi: 10.1136/bmjgh-2018-001343 (PMC6509610; doi:10.1136/bmjgh-2018-001343), 2019-04-29

# Community and facility-based supervision structures

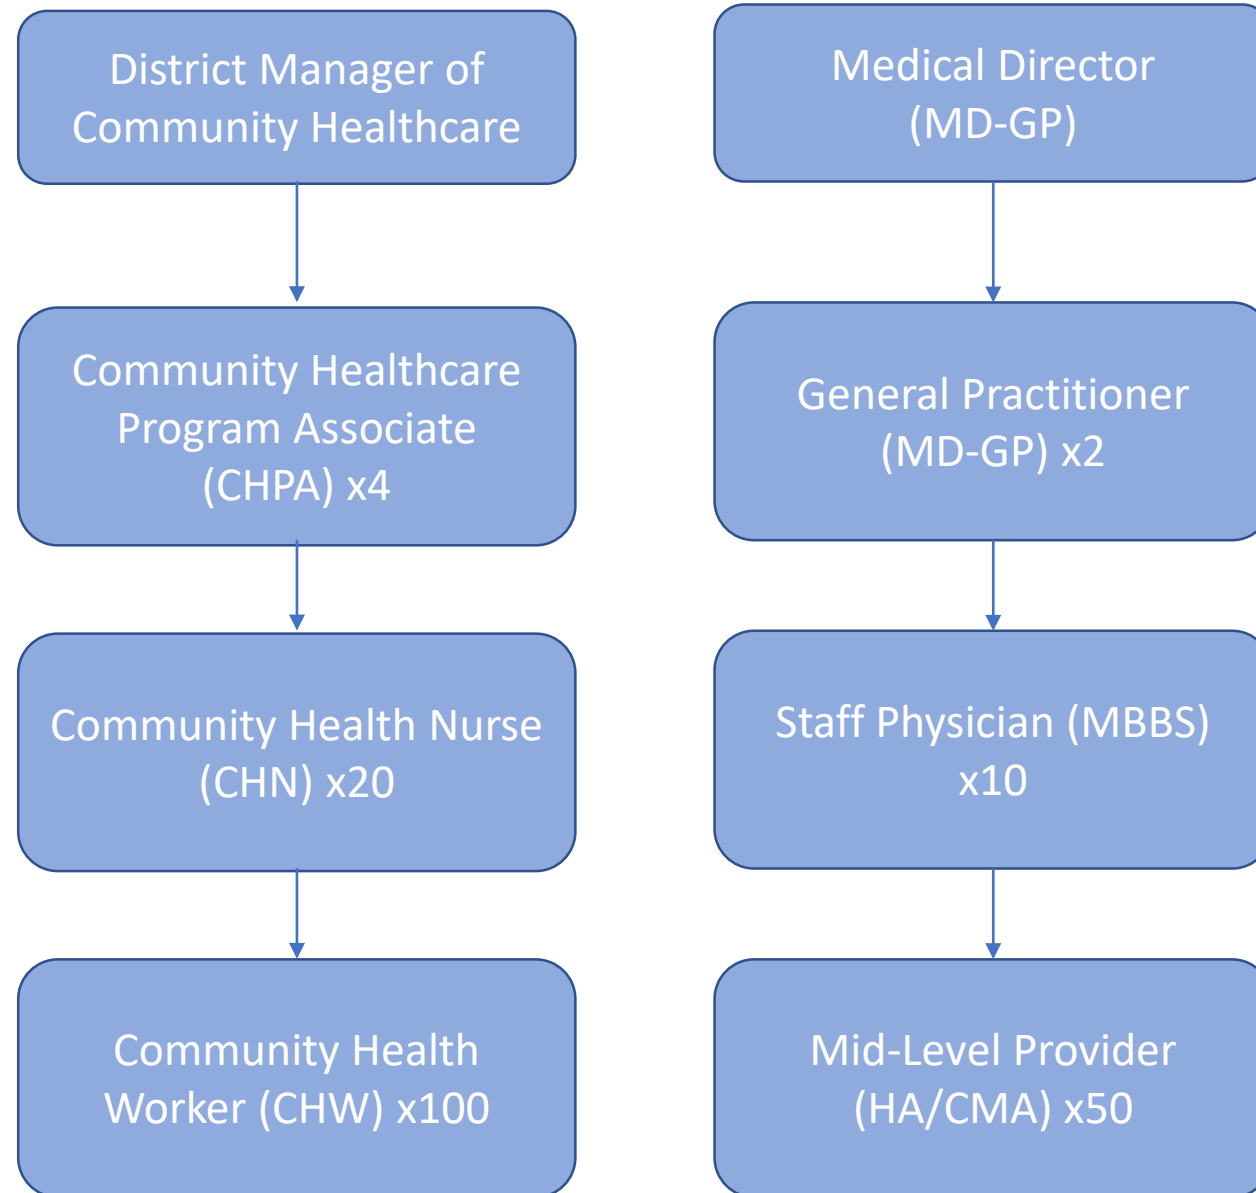

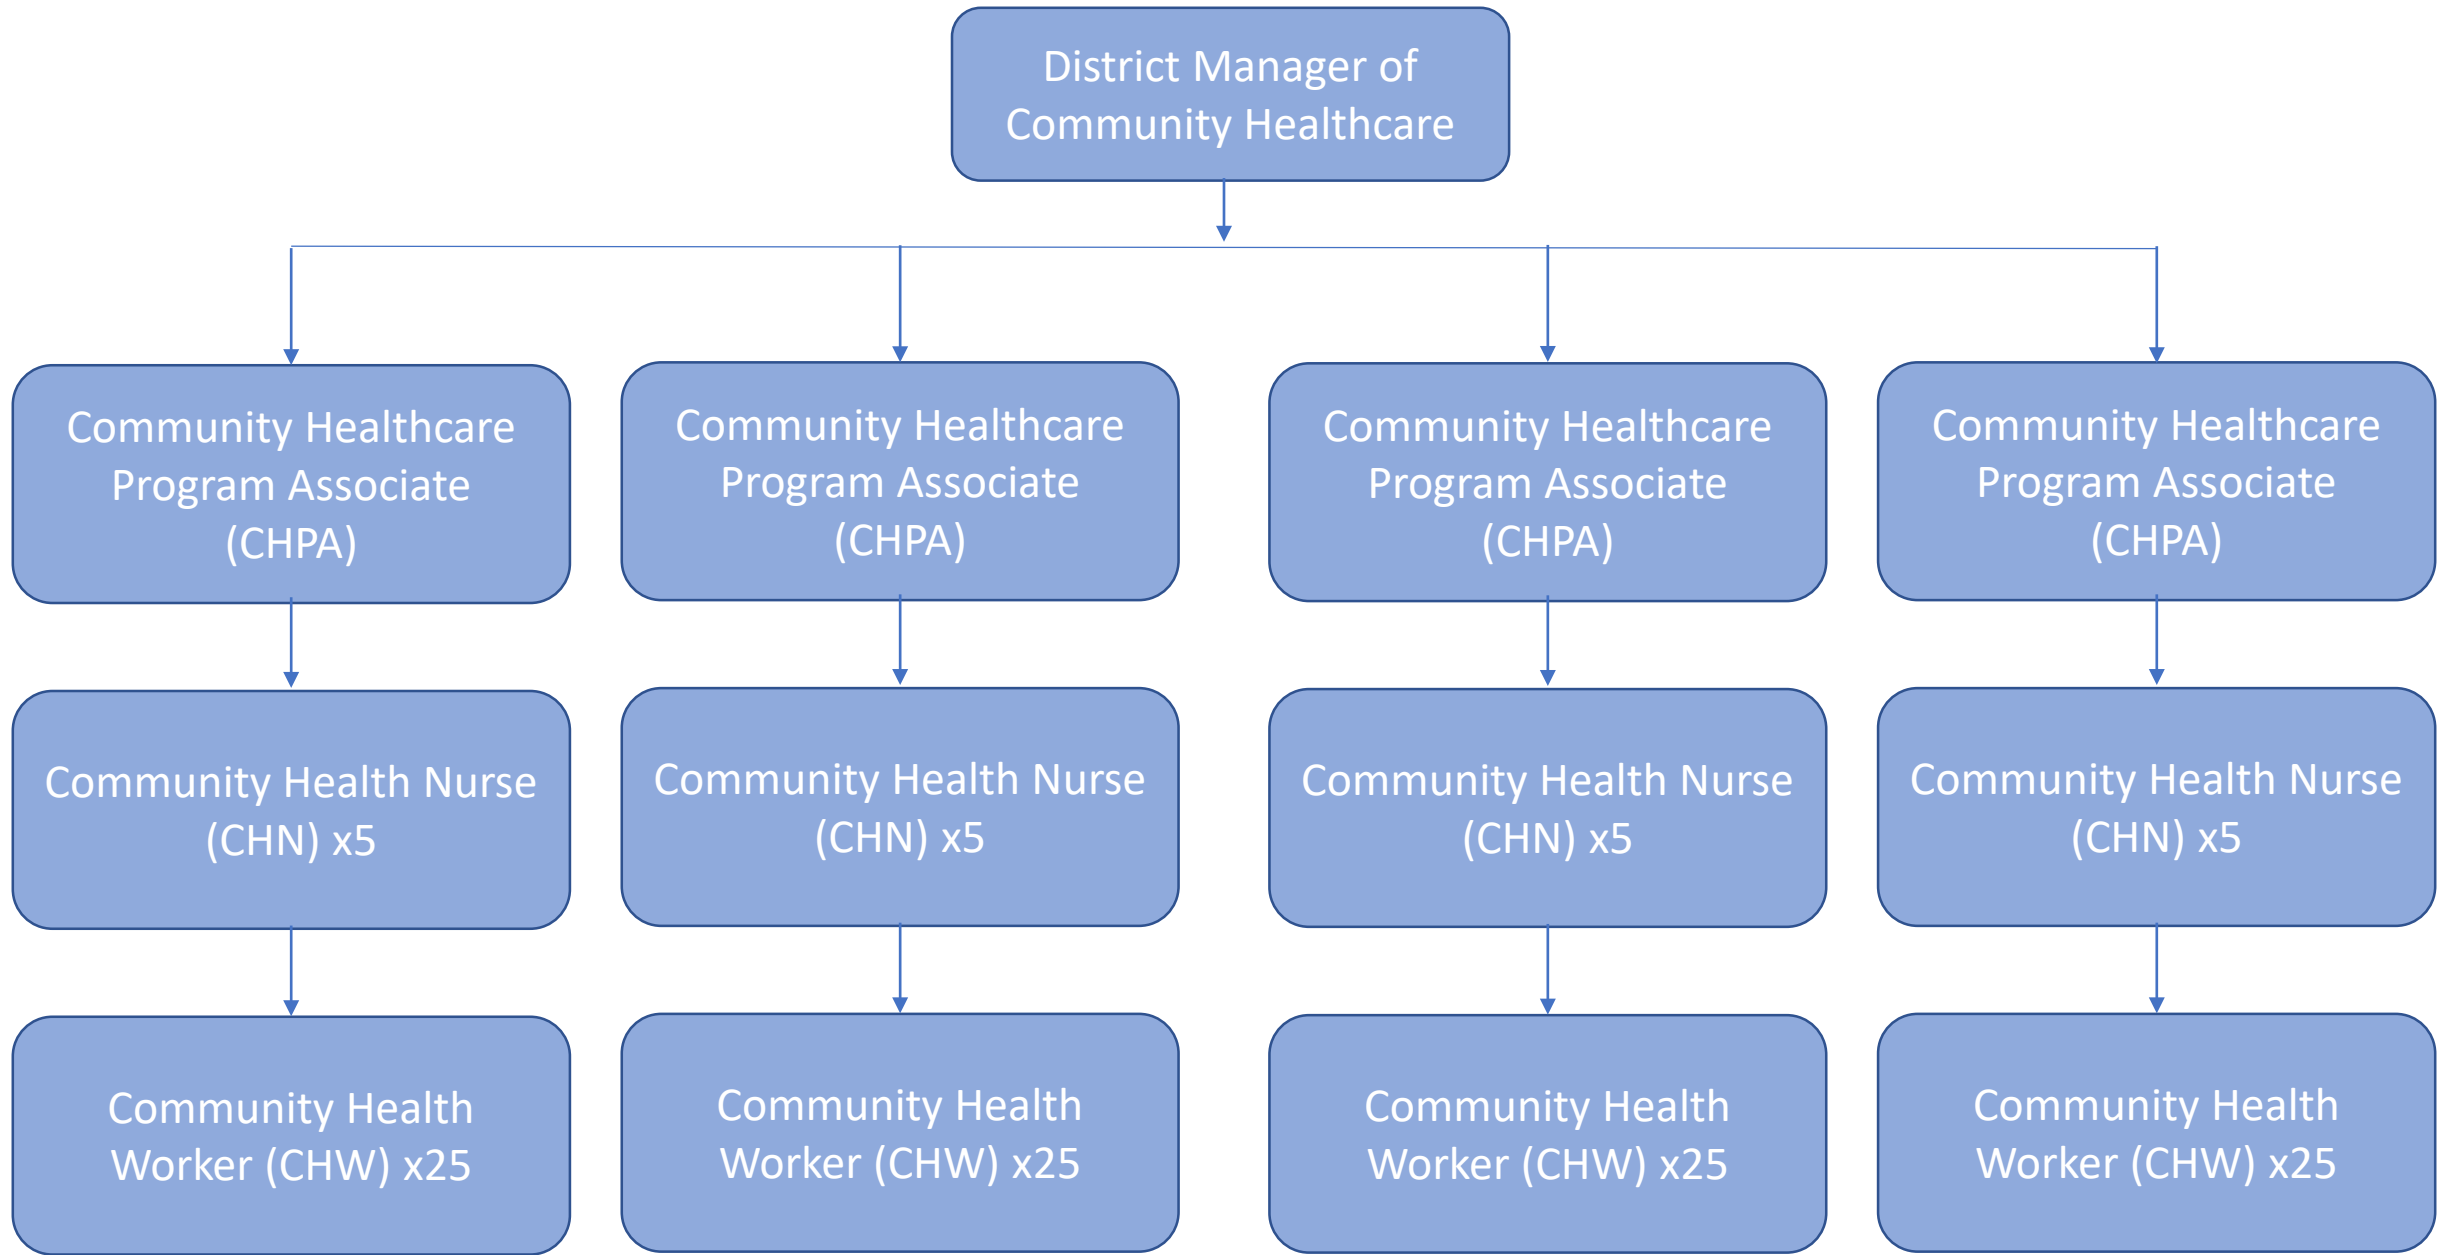

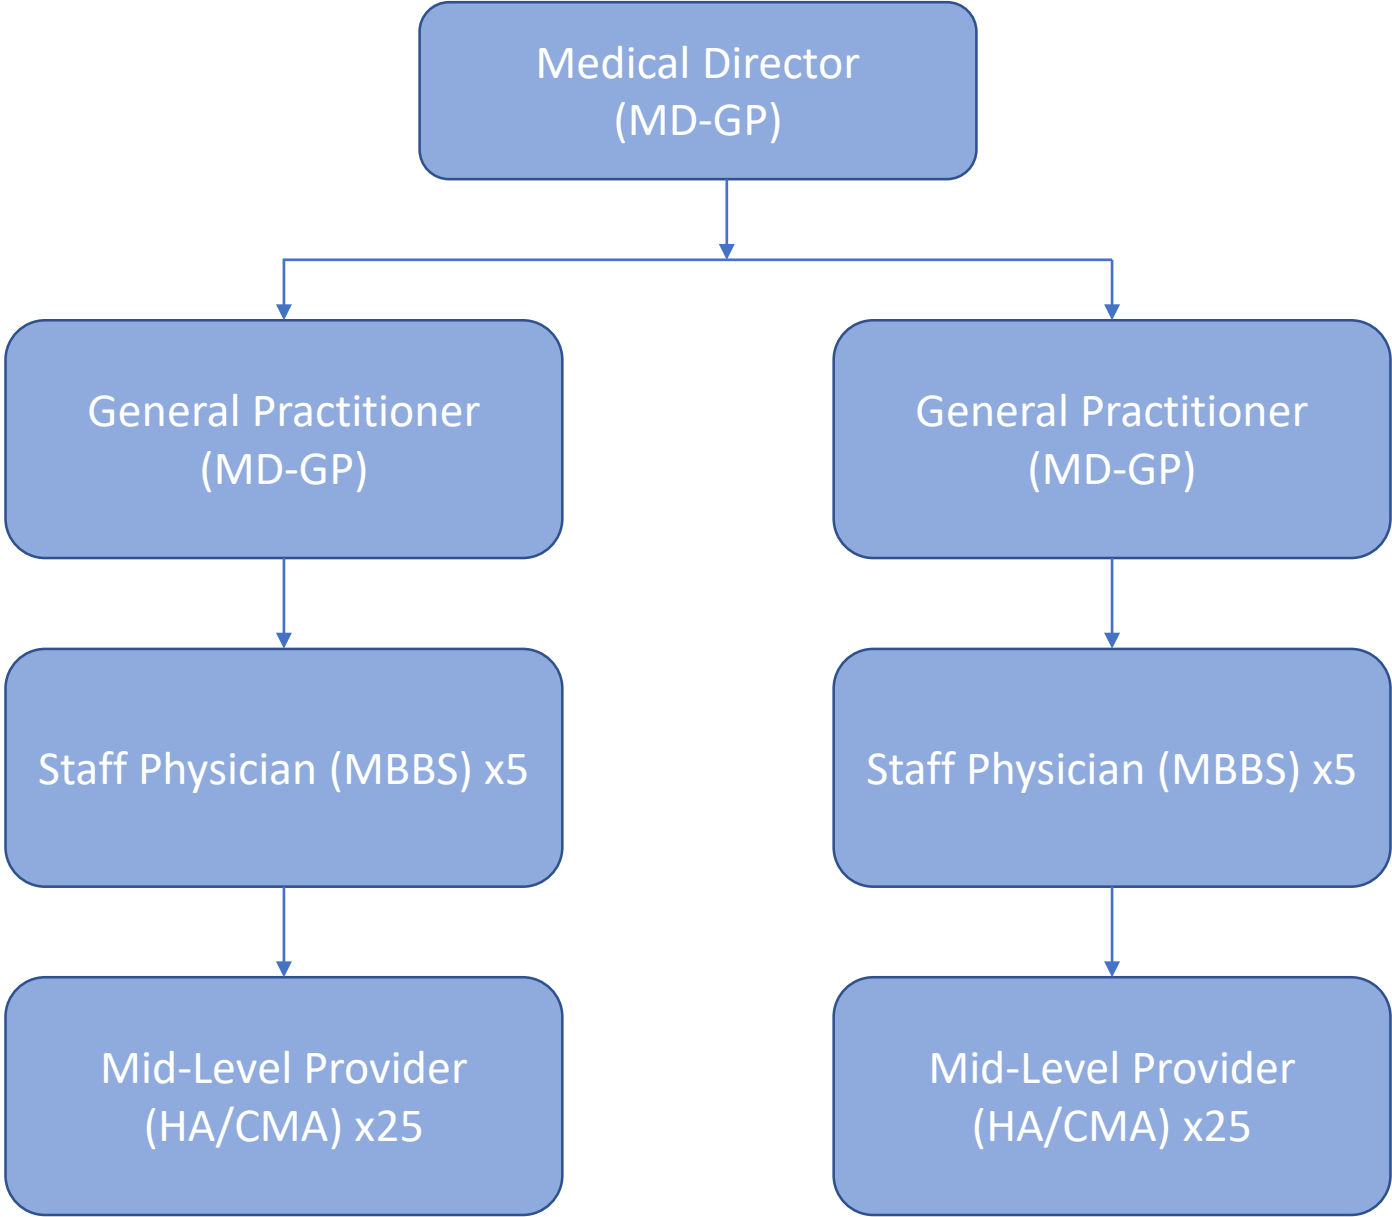

Supplement: bmjgh-2018-001343supp002.pdf [file bmjgh-2018-001343supp002.pdf]
